# Supplementary material for: Efficient acceptorless dehydrogenation of hydrogen-rich N-heterocycles photocatalyzed by Ni(OH)2@CdSe/CdS quantum dots
Source: Royal Society of Chemistry journal article supplement (doi:10.1039/d1cy00366f), 2021-01-01
Supplement: d1cy00366f1.pdf [file d1cy00366f1.pdf]

## Electronic Supplementary Information

### Efficient acceptorless dehydrogenation of hydrogen-rich *N*-heterocycles photocatalyzed by Ni(OH)<sub>2</sub>@CdSe/CdS quantum dots

Yanpeng Liu,<sup>ab</sup> Tianjun Yu,<sup>\*a</sup> Yi Zeng,<sup>ab</sup> Jinping Chen,<sup>a</sup> Guoqiang Yang,<sup>bc</sup> and Yi Li<sup>\*ab</sup>

---

<sup>a</sup>Key Laboratory of Photochemical Conversion and Optoelectronic Materials, Technical Institute of Physics and Chemistry, Chinese Academy of Sciences, Beijing, 100190, China. E-mail: [tianjun\\_yu@mail.ipc.ac.cn](mailto:tianjun_yu@mail.ipc.ac.cn); [yili@mail.ipc.ac.cn](mailto:yili@mail.ipc.ac.cn)

<sup>b</sup>University of Chinese Academy of Sciences, Beijing, 100049, P. R. China.

<sup>c</sup>Key Laboratory of Photochemistry, Institute of Chemistry, Chinese Academy of Sciences, Beijing, 100190, P. R. China.

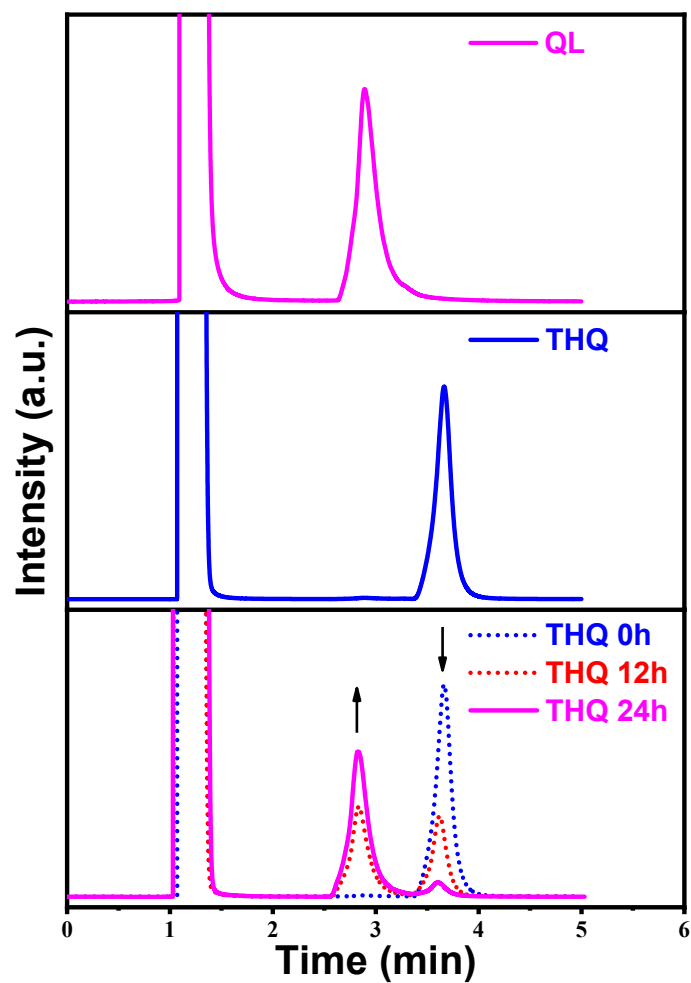

**Figure S1.** GC-FID analyses for THQ and QL. Experimental conditions were as follows: [CdSe/CdS QDs] = 2.8 mg/mL; [NiCl<sub>2</sub>] = 1.6 mM; [THQ] = 20 mM; H<sub>2</sub>O/CH<sub>3</sub>CN (v/v = 2/3, 5 mL); the photocatalytic reactions were performed under blue LED irradiation ( $\lambda = 420$  nm, I = 50 mW/cm<sup>2</sup>).

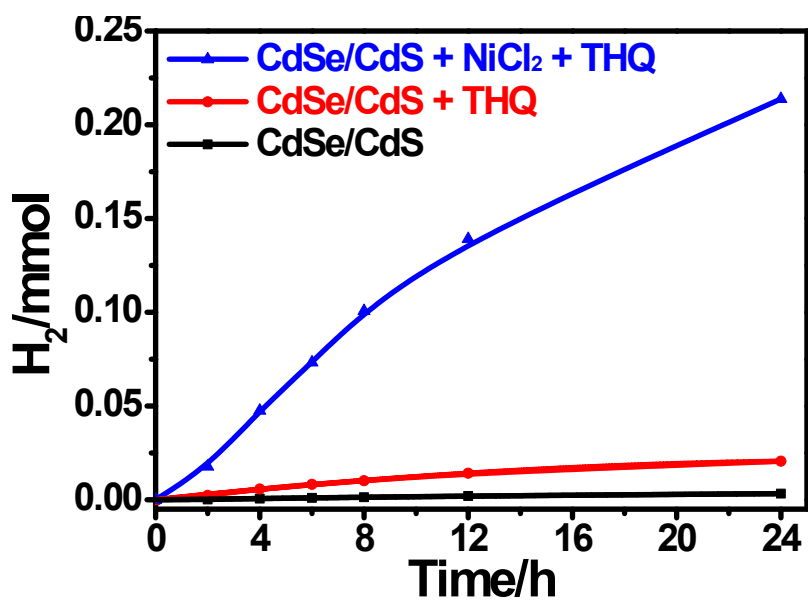

**Figure S2.** Time dependent photocatalytic hydrogen release over Ni(OH)<sub>2</sub>@CdSe/CdS QDs. Experimental conditions were as follows: [CdSe/CdS] = 2.8 mg/mL, [NiCl<sub>2</sub>] = 1.6 mM, [THQ] = 20 mM, H<sub>2</sub>O/CH<sub>3</sub>CN (v/v) = 2/3, the photocatalytic reactions were performed under blue LED irradiation ( $\lambda = 420$  nm, I = 50 mW/cm<sup>2</sup>).

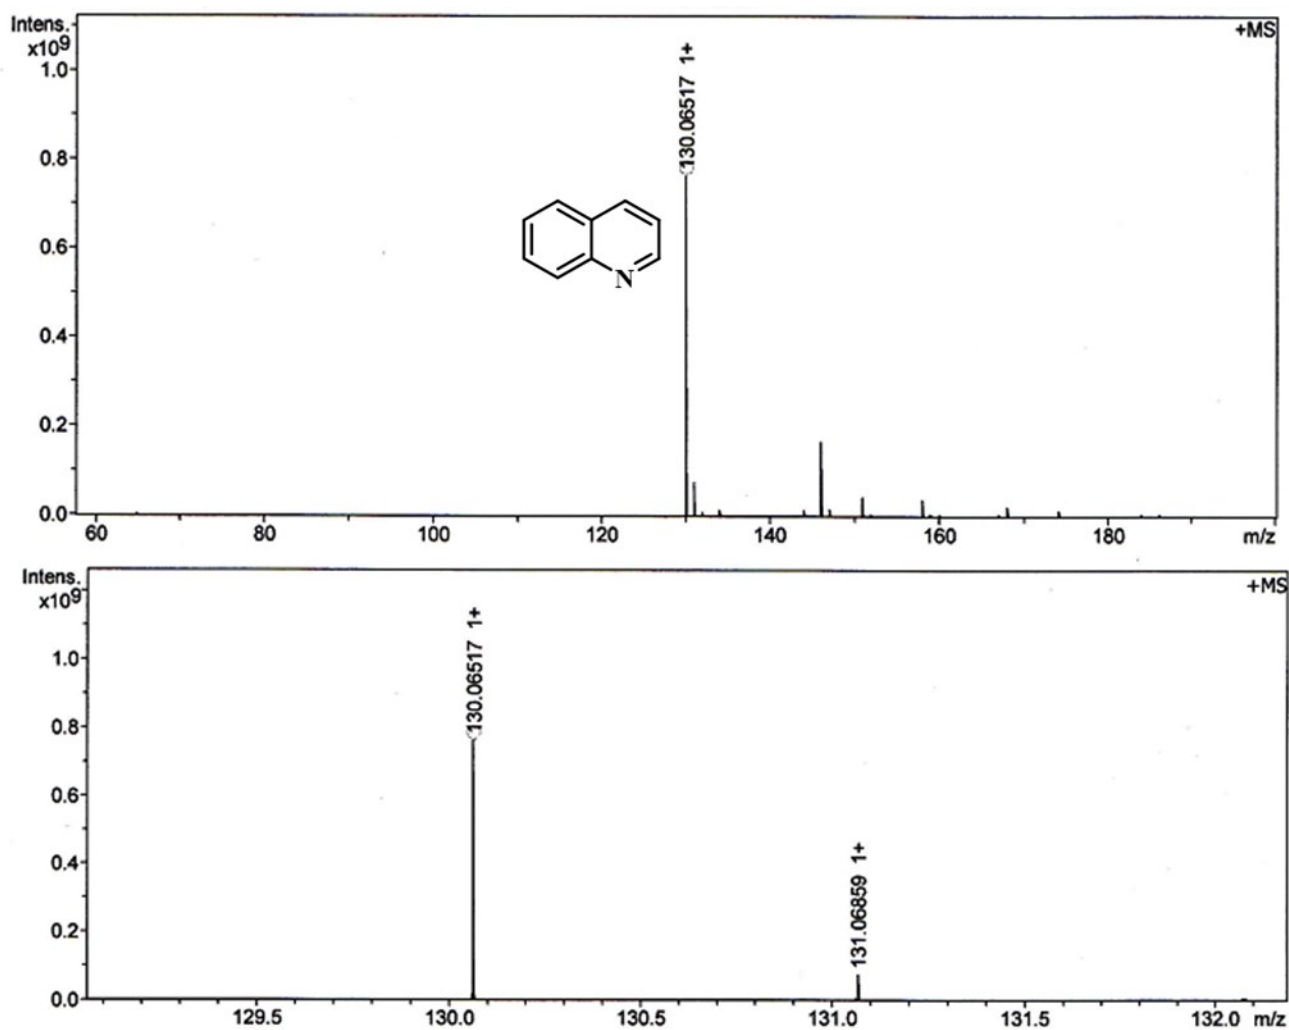

**Figure S3.** ESI-MS of the reaction solution (Table 1 entry 1).

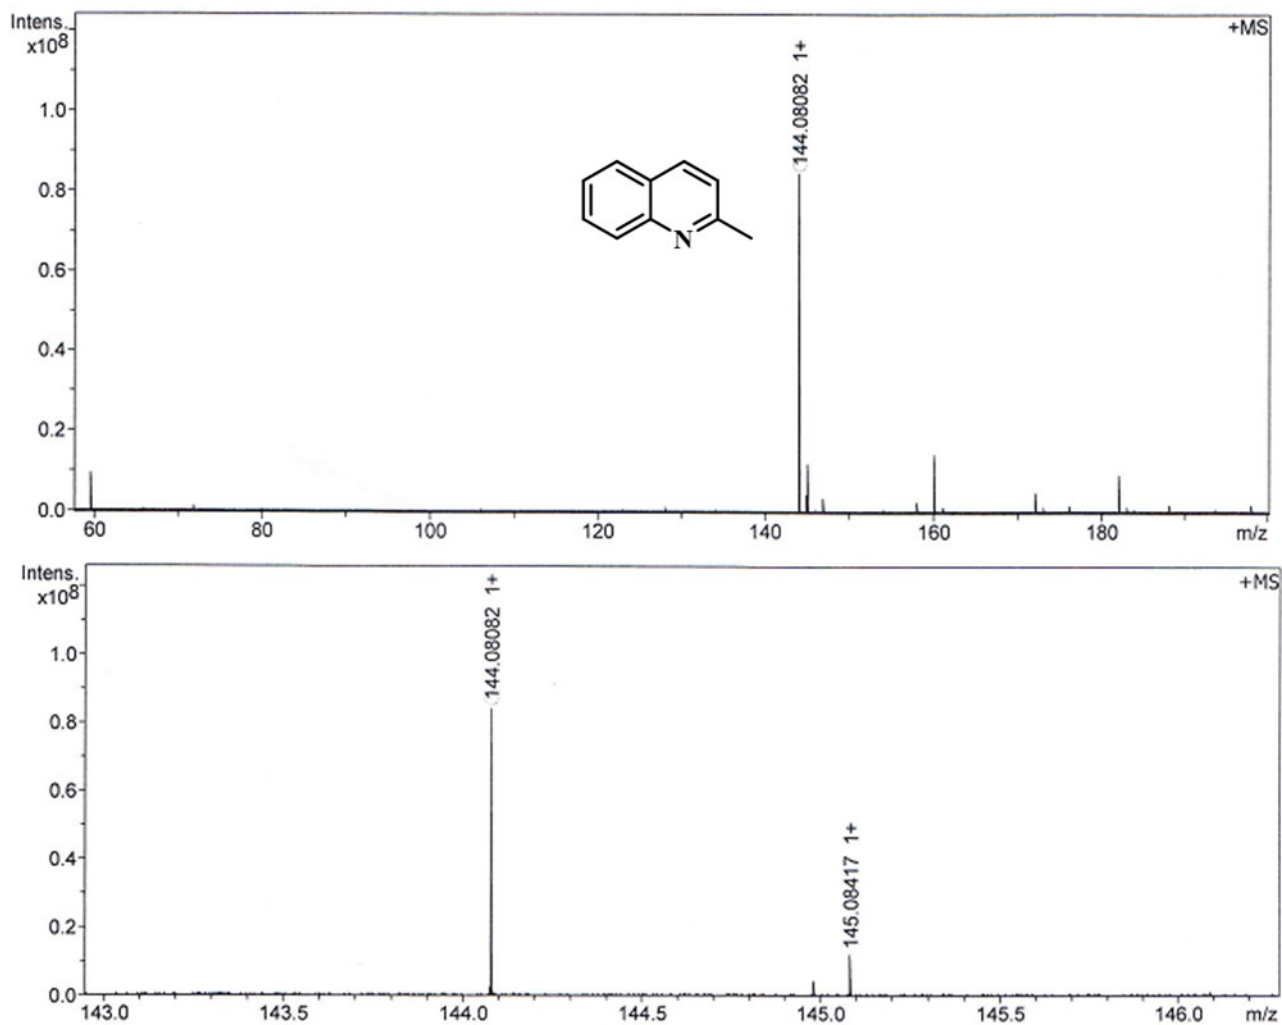

**Figure S4.** ESI-MS of the reaction solution (Table 1 entry 2).

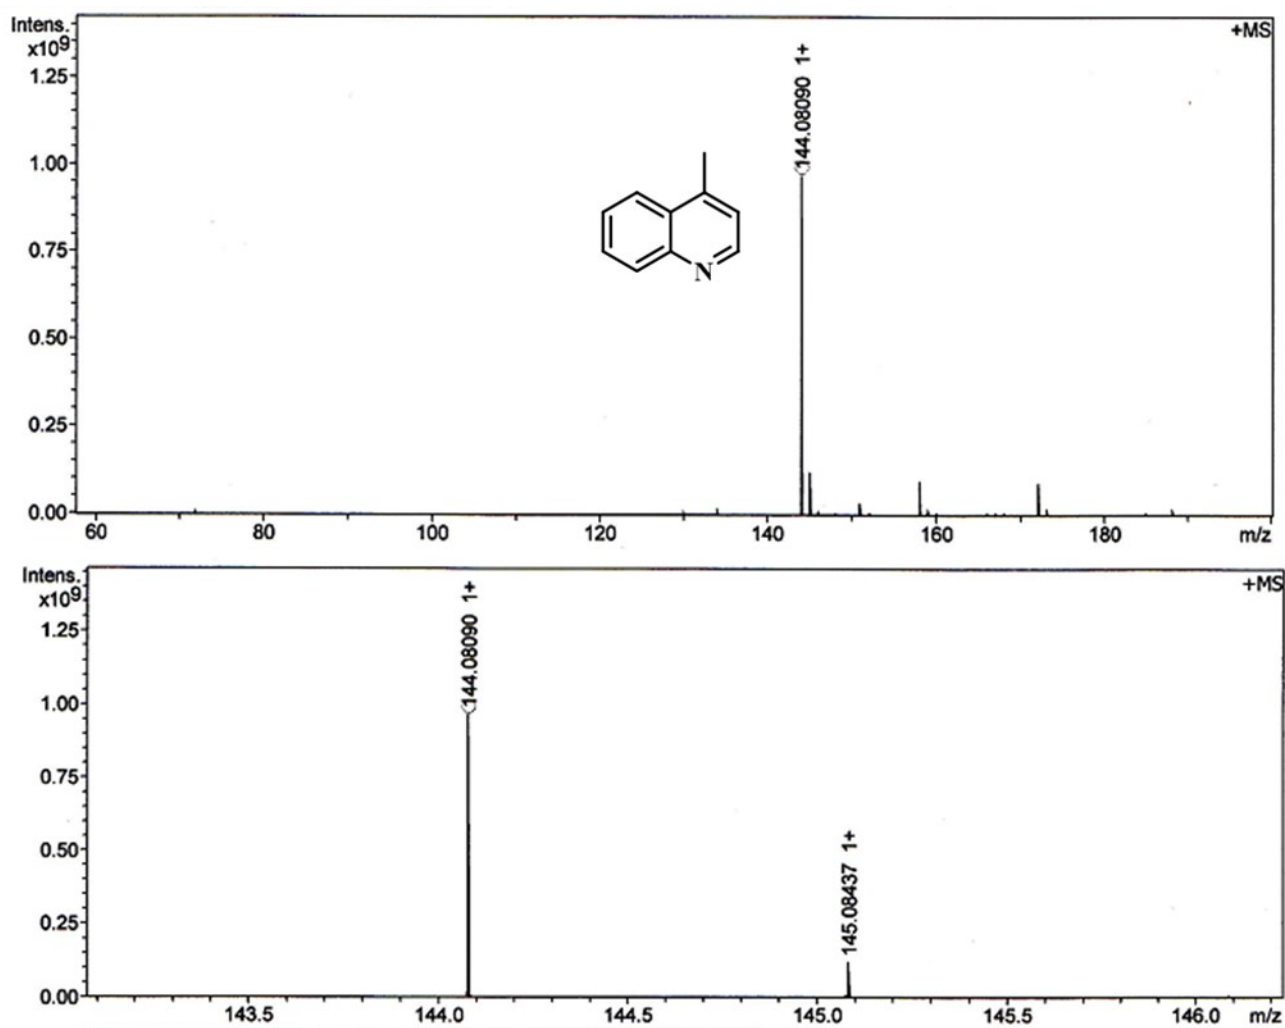

Figure S5. ESI-MS of the reaction solution (Table 1 entry 3).

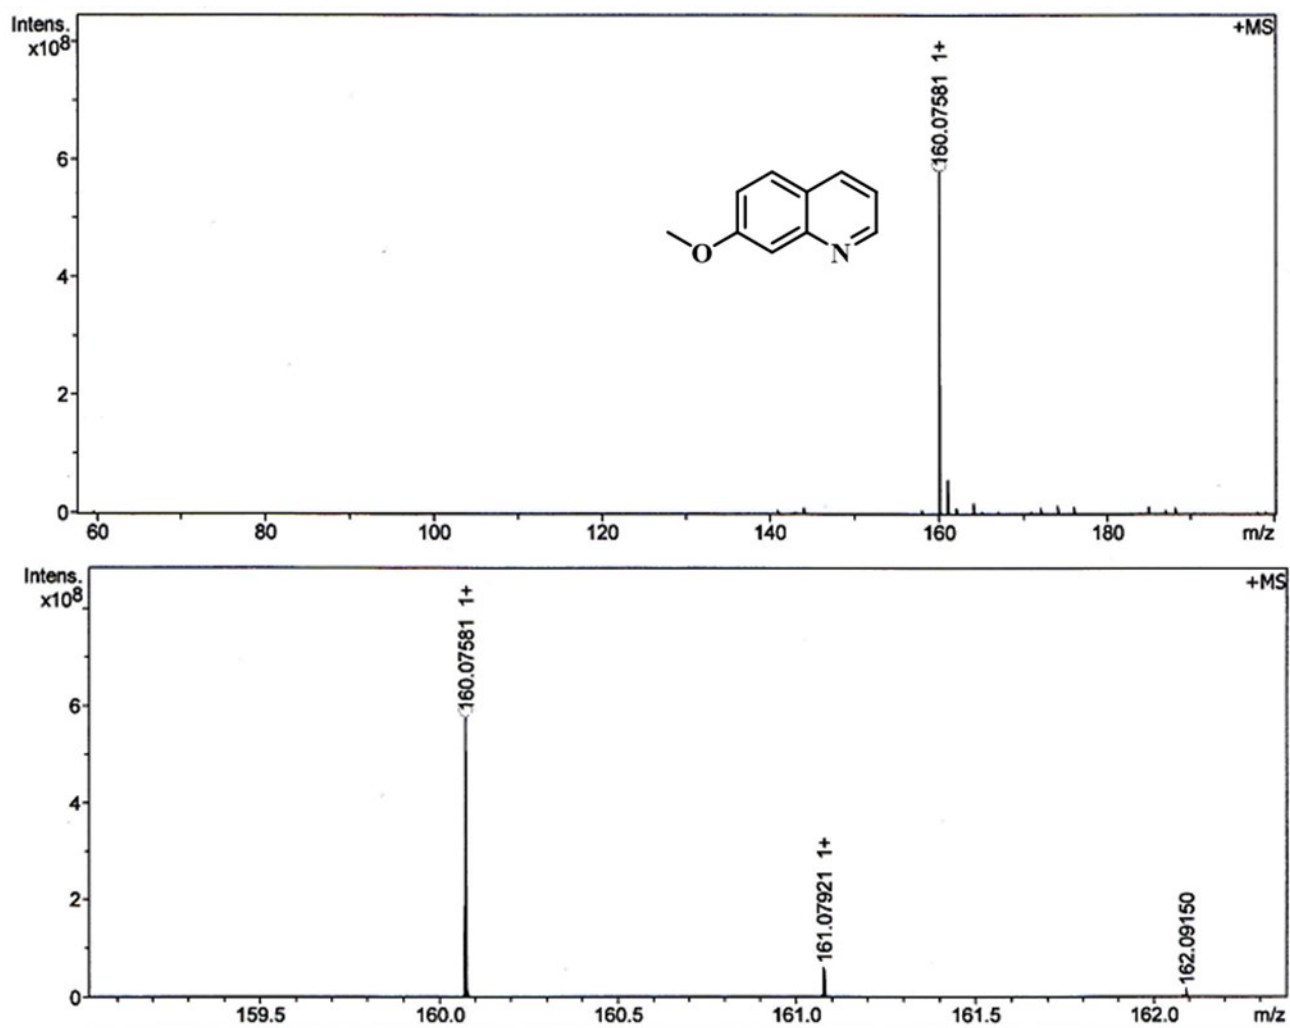

**Figure S6.** ESI-MS of the reaction solution (Table 1 entry 4).

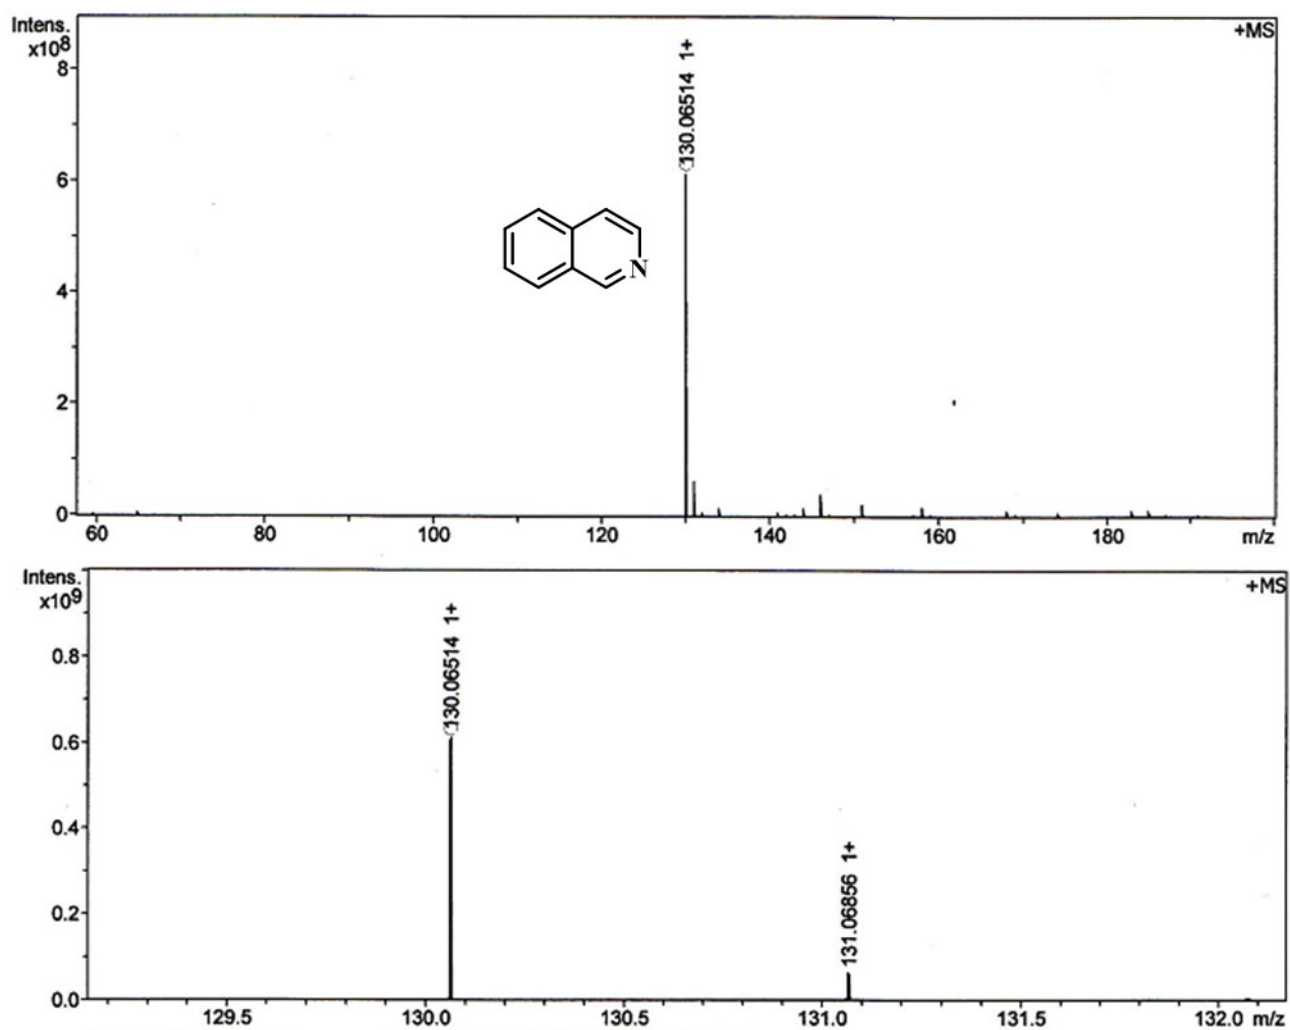

**Figure S7.** ESI-MS of the reaction solution (Table 1 entry 5).



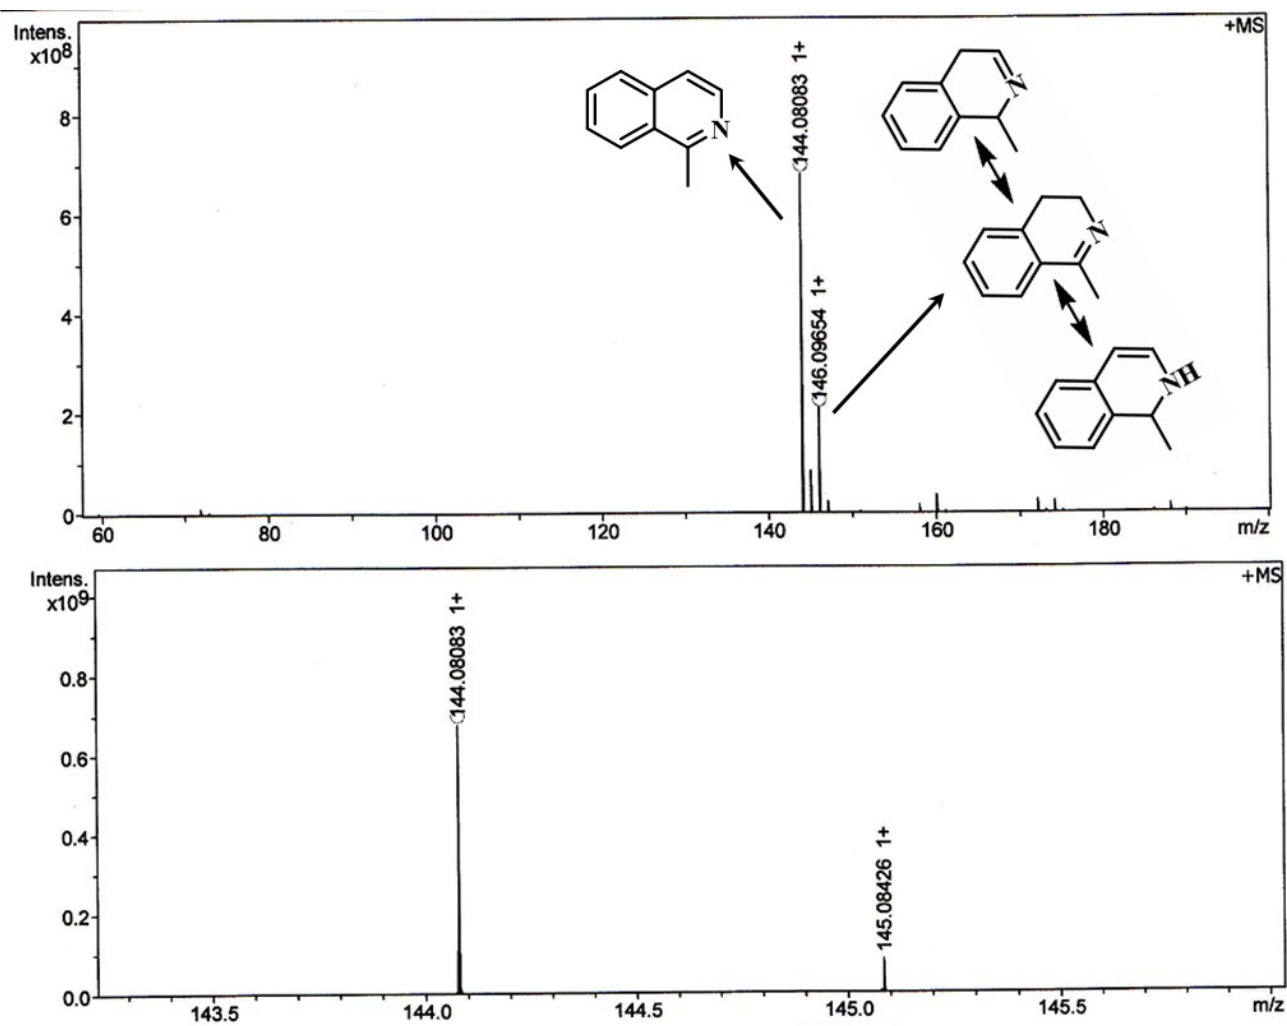

**Figure S8.** ESI-MS of the reaction solution (Table 1 entry 6).

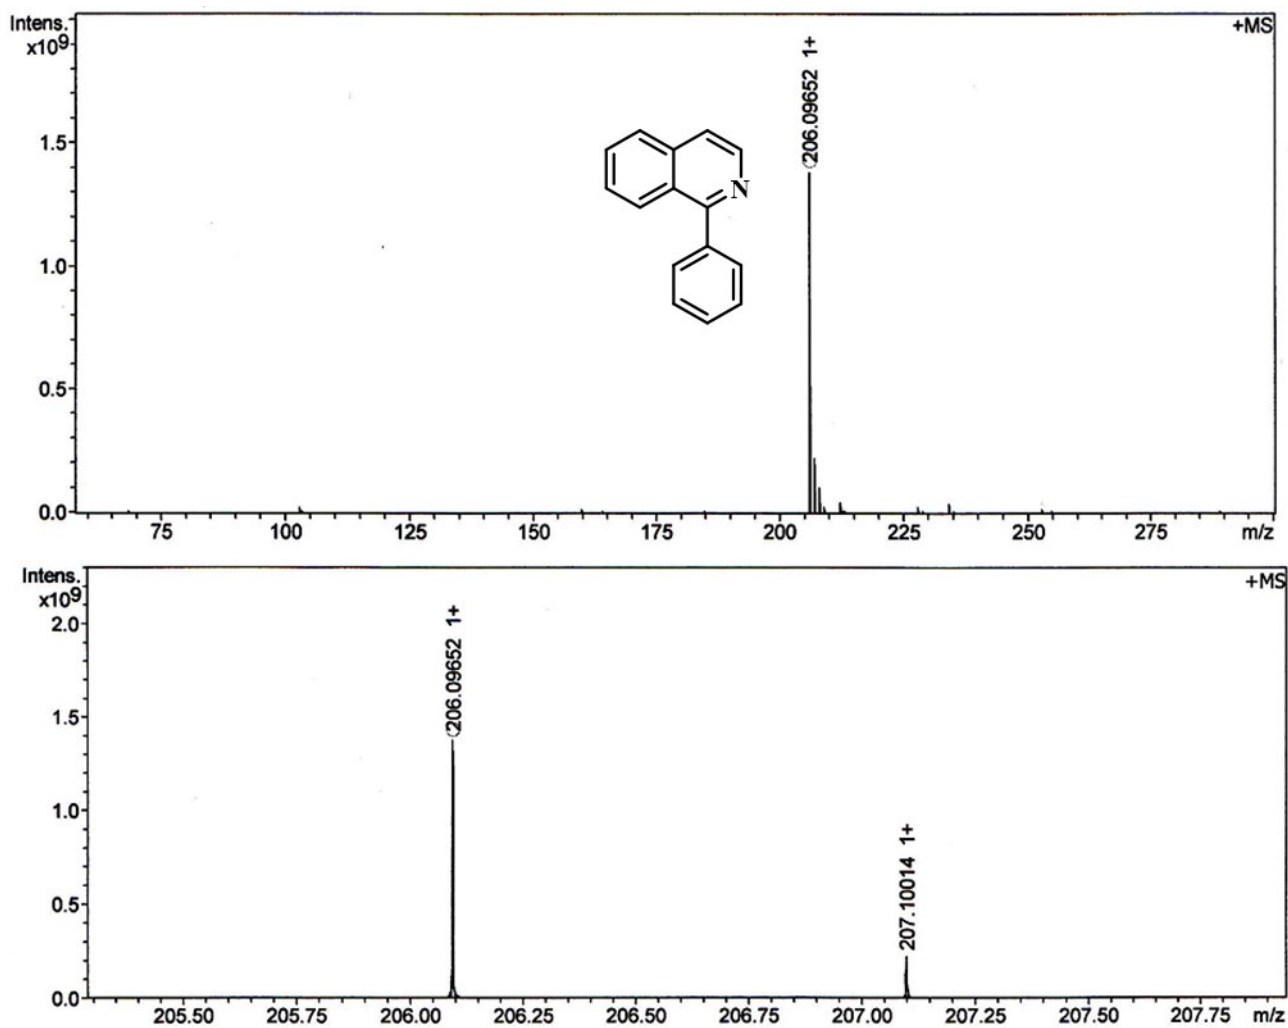

**Figure S9.** ESI-MS of the reaction solution (Table 1 entry 7).

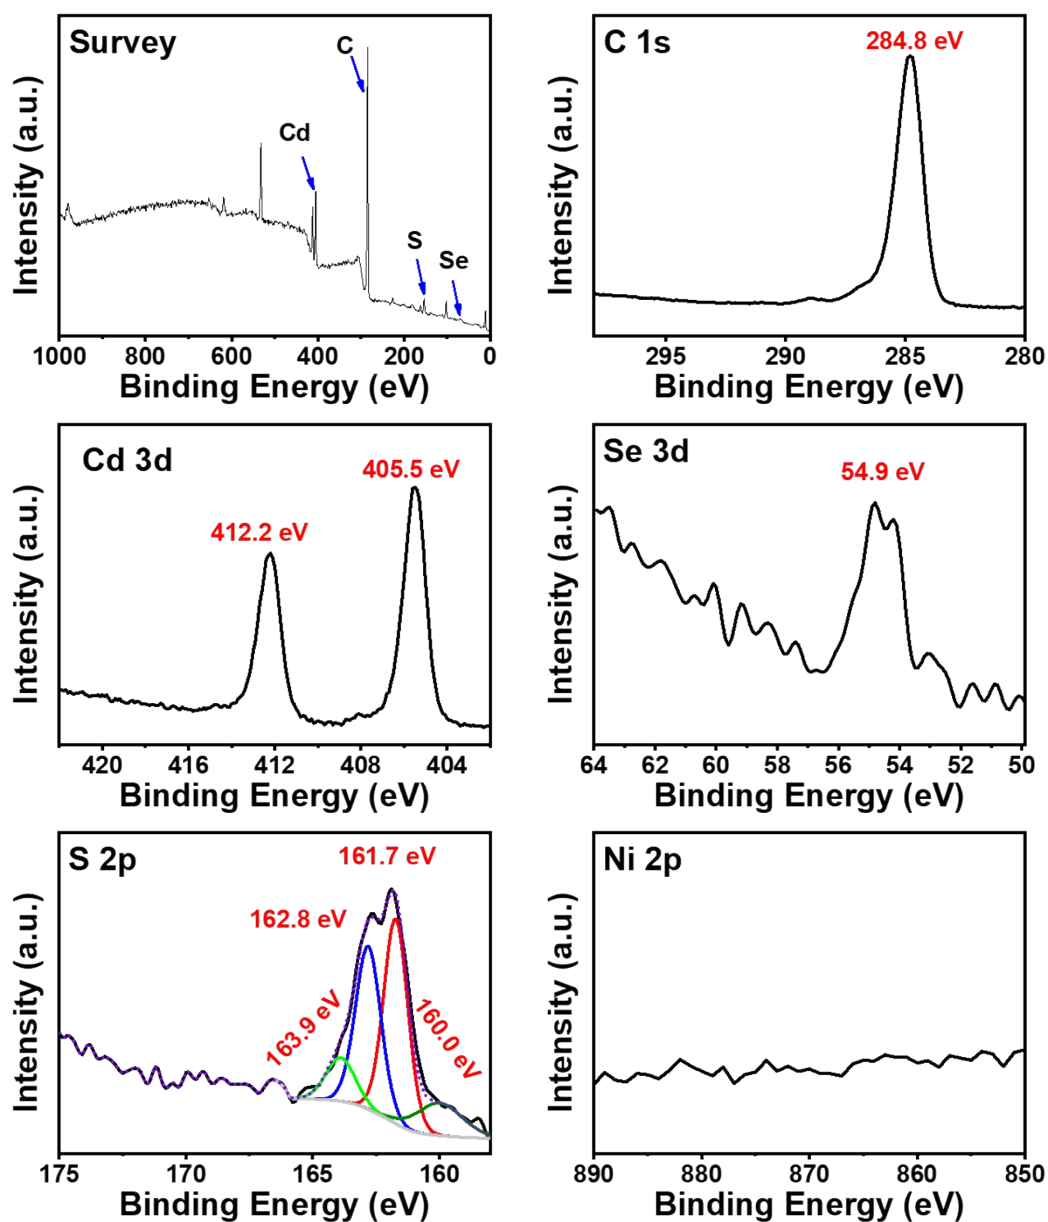

**Figure S10.** XPS spectrum of CdSe/CdS QDs; high-resolution XPS spectra of C 1s, Cd 3d, Se 3d, S 2p, Ni 2p.

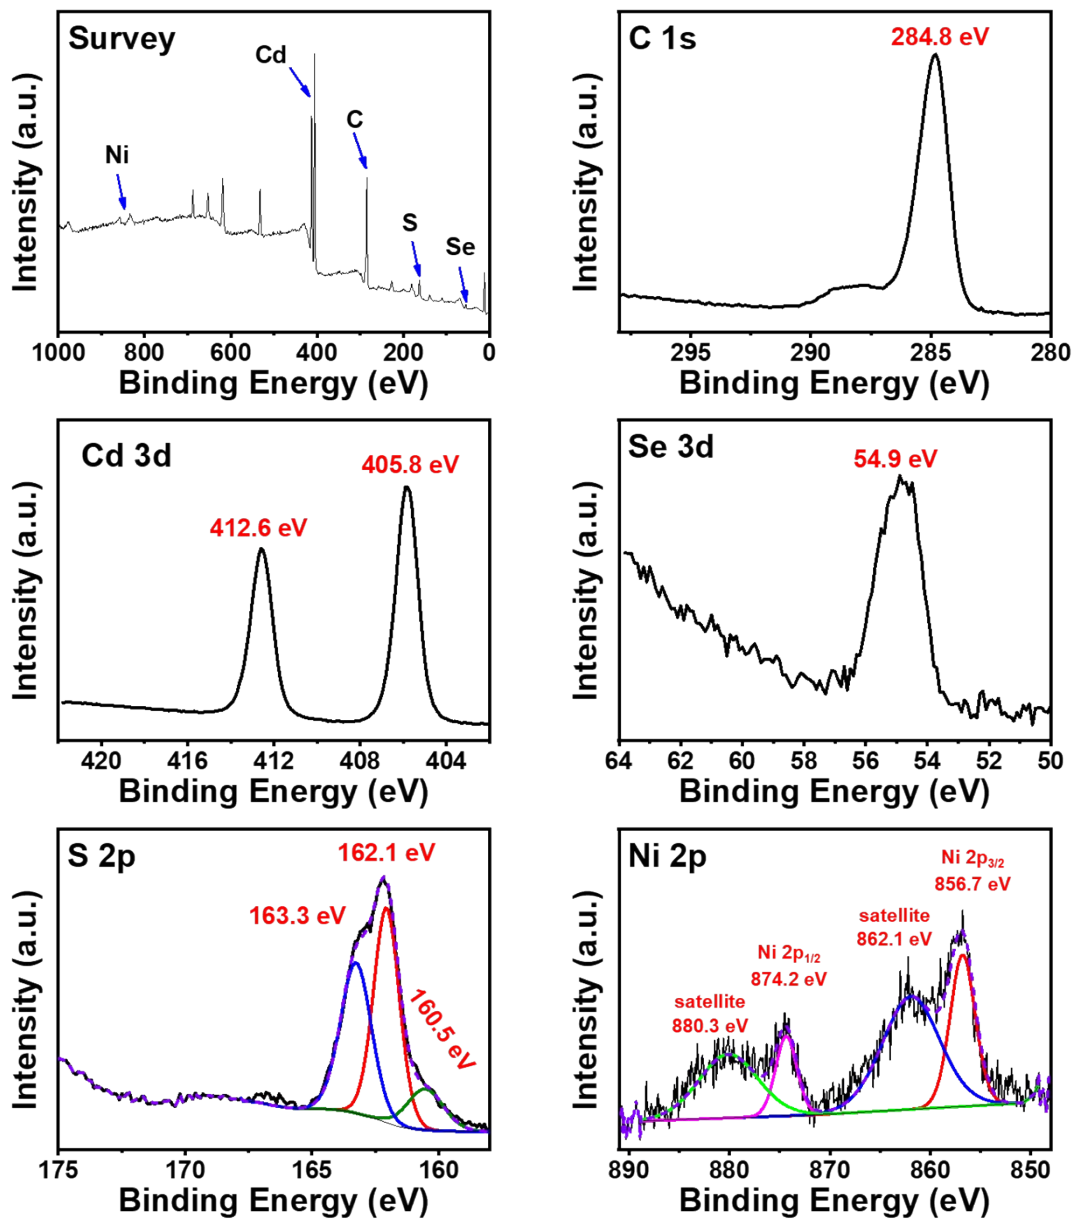

**Figure S11.** XPS spectra of Ni(OH)<sub>2</sub>@CdSe/CdS QDs; high-resolution XPS spectra of C 1s, Cd 3d, Se 3d, S 2p, Ni 2p.

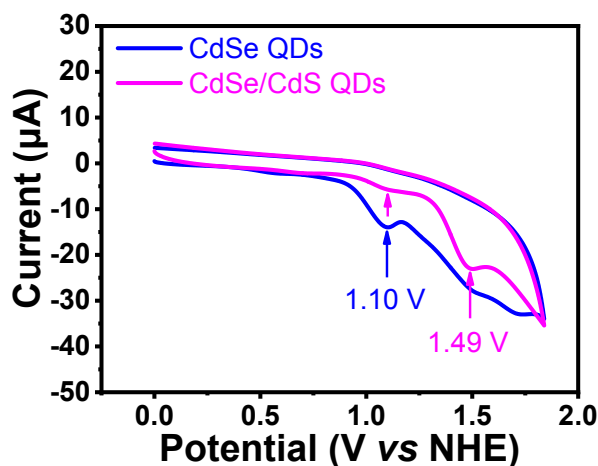

**Figure S12.** Cyclic voltammetry curve of CdSe (0.4 mg/mL, blue) and CdSe/CdS QDs (0.3 mg/mL, magenta) in degassed water without electrolyte, scan rate: 50 mV/s.

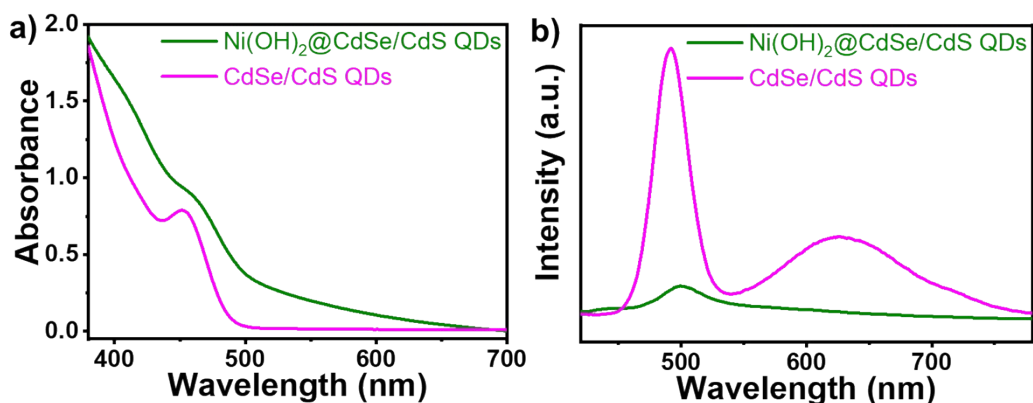

**Figure S13.** a) Absorption and b) normalized emission spectra of Ni(OH)<sub>2</sub>@CdSe/CdS and CdSe/CdS QDs ( $\lambda_{ex} = 400$  nm).

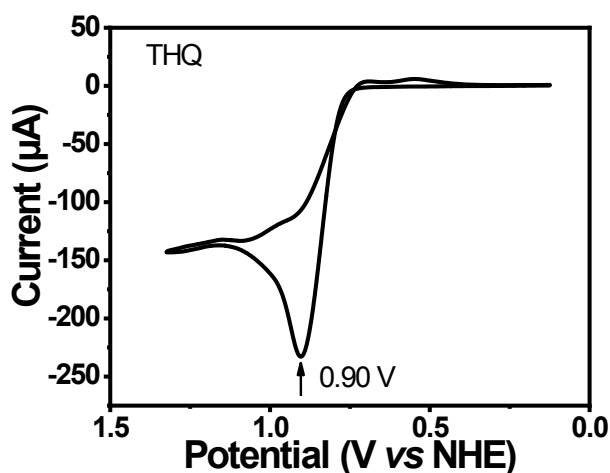

**Figure S14.** Cyclic voltammetry curve of THQ (1 mM) in degassed CH<sub>3</sub>CN with 0.1 M NBu<sub>4</sub>PF<sub>6</sub> as

electrolyte, scan rate: 50 mV/s.

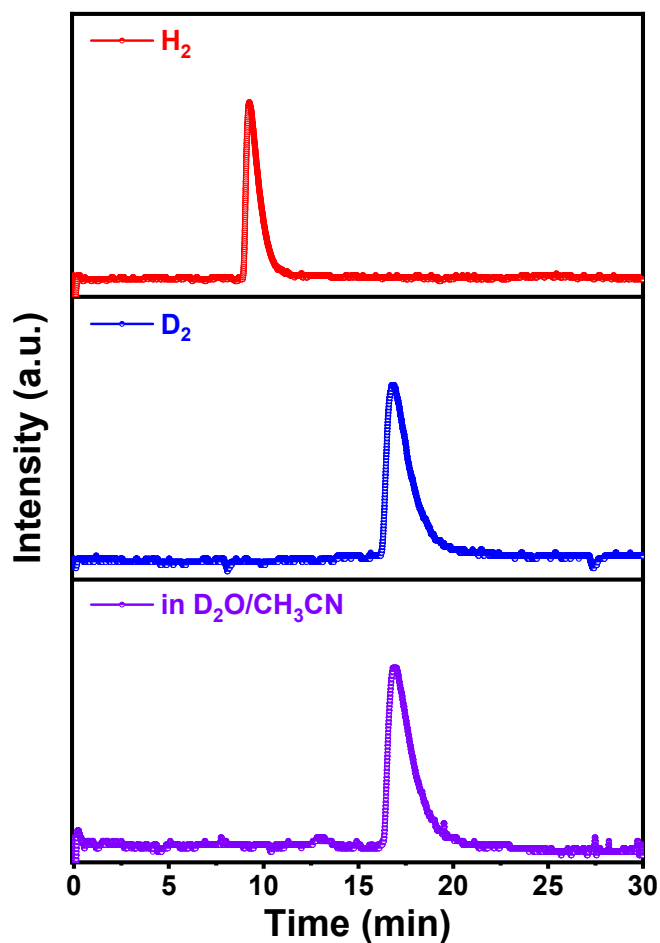

**Figure S15.** GC-TCD analyses using 15 %  $\text{MnCl}_2@ \gamma\text{-Al}_2\text{O}_3$  as column packing for high purity  $\text{H}_2$  (top), high purity  $\text{D}_2$  (middle) and the gas phase of photocatalytic dehydrogenation of THQ in  $\text{D}_2\text{O}/\text{CH}_3\text{CN}$  (bottom). Experimental conditions were as follows:  $[\text{CdSe}/\text{CdS QDs}] = 2.8 \text{ mg/mL}$ ;  $[\text{NiCl}_2] = 1.6 \text{ mM}$ ;  $[\text{THQ}] = 20 \text{ mM}$ ;  $\text{H}_2\text{O}/\text{CH}_3\text{CN}$  (v/v = 2/3, 5 mL); the photocatalytic reactions were performed under blue LED irradiation ( $\lambda = 420 \text{ nm}$ ,  $I = 50 \text{ mW/cm}^2$ ).

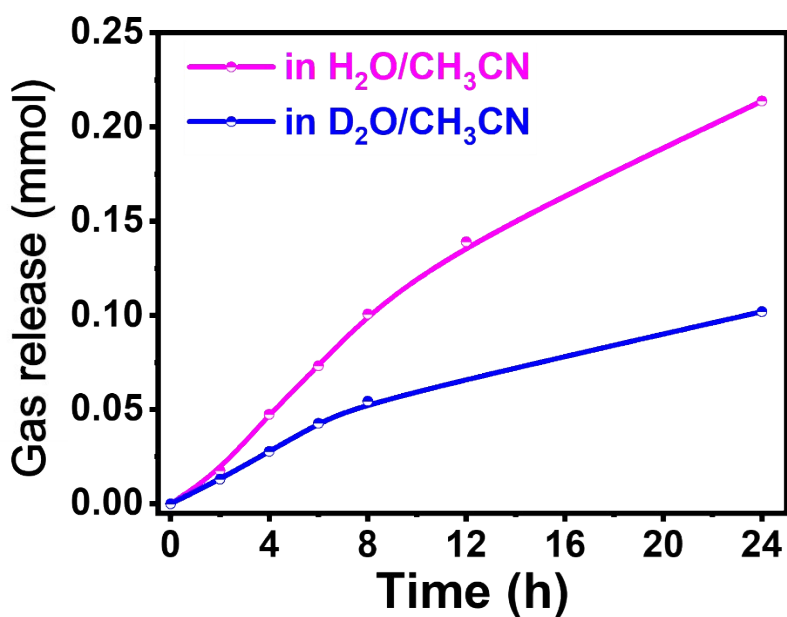

**Figure S16.** Time dependent photocatalytic H<sub>2</sub> or D<sub>2</sub> release over Ni(OH)<sub>2</sub>@CdSe/CdS QDs. Experimental conditions were as follows: [CdSe/CdS] = 2.8 mg/mL, [NiCl<sub>2</sub>] = 1.6 mM, [THQ] = 20 mM, H<sub>2</sub>O or D<sub>2</sub>O/CH<sub>3</sub>CN (v/v) = 2/3, the photocatalytic reactions were performed under blue LED irradiation ( $\lambda = 420$  nm,  $I = 50$  mW/cm<sup>2</sup>).

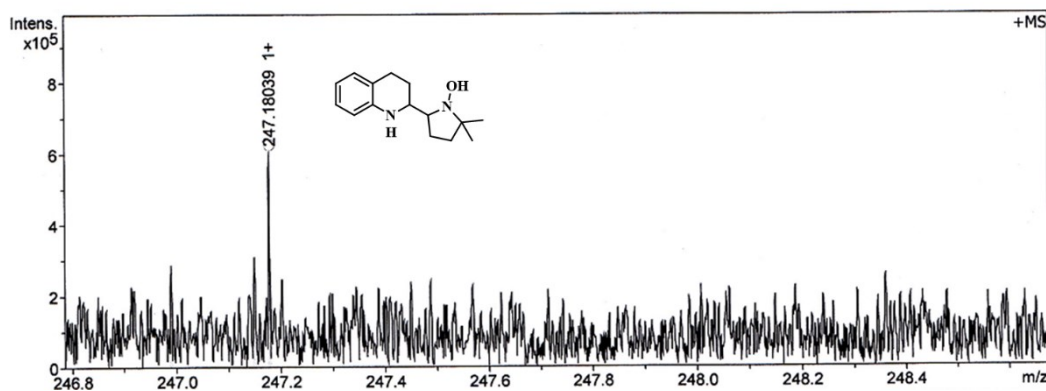

**Figure S17.** ESI-MS spectrum of adduct between the radical intermedia of THQ and DMPO.

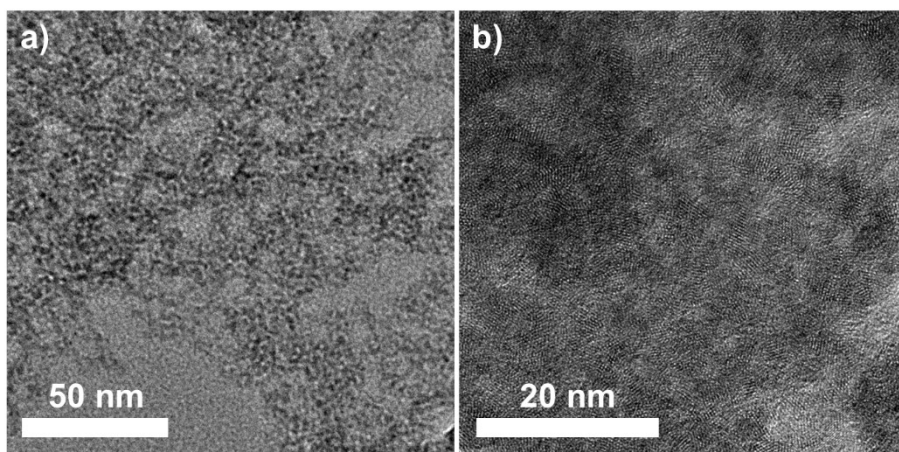

**Figure S18.** TEM images of a) CdSe and b) CdSe/CdS QDs.
